# Supplementary material for: National survey on clinical and genetic characteristics of patients with hereditary angioedema in Latvia
Source: PubMed Central journal article supplement (PMC10082512; doi:10.1186/s13223-023-00783-6), 2023-04-08

**Additional file 1: figure S1.** Family tree and timeline presentation of clinical characteristics, therapy, laboratory and genetic test results in a patient with hereditary angioedema. **Patient 1**

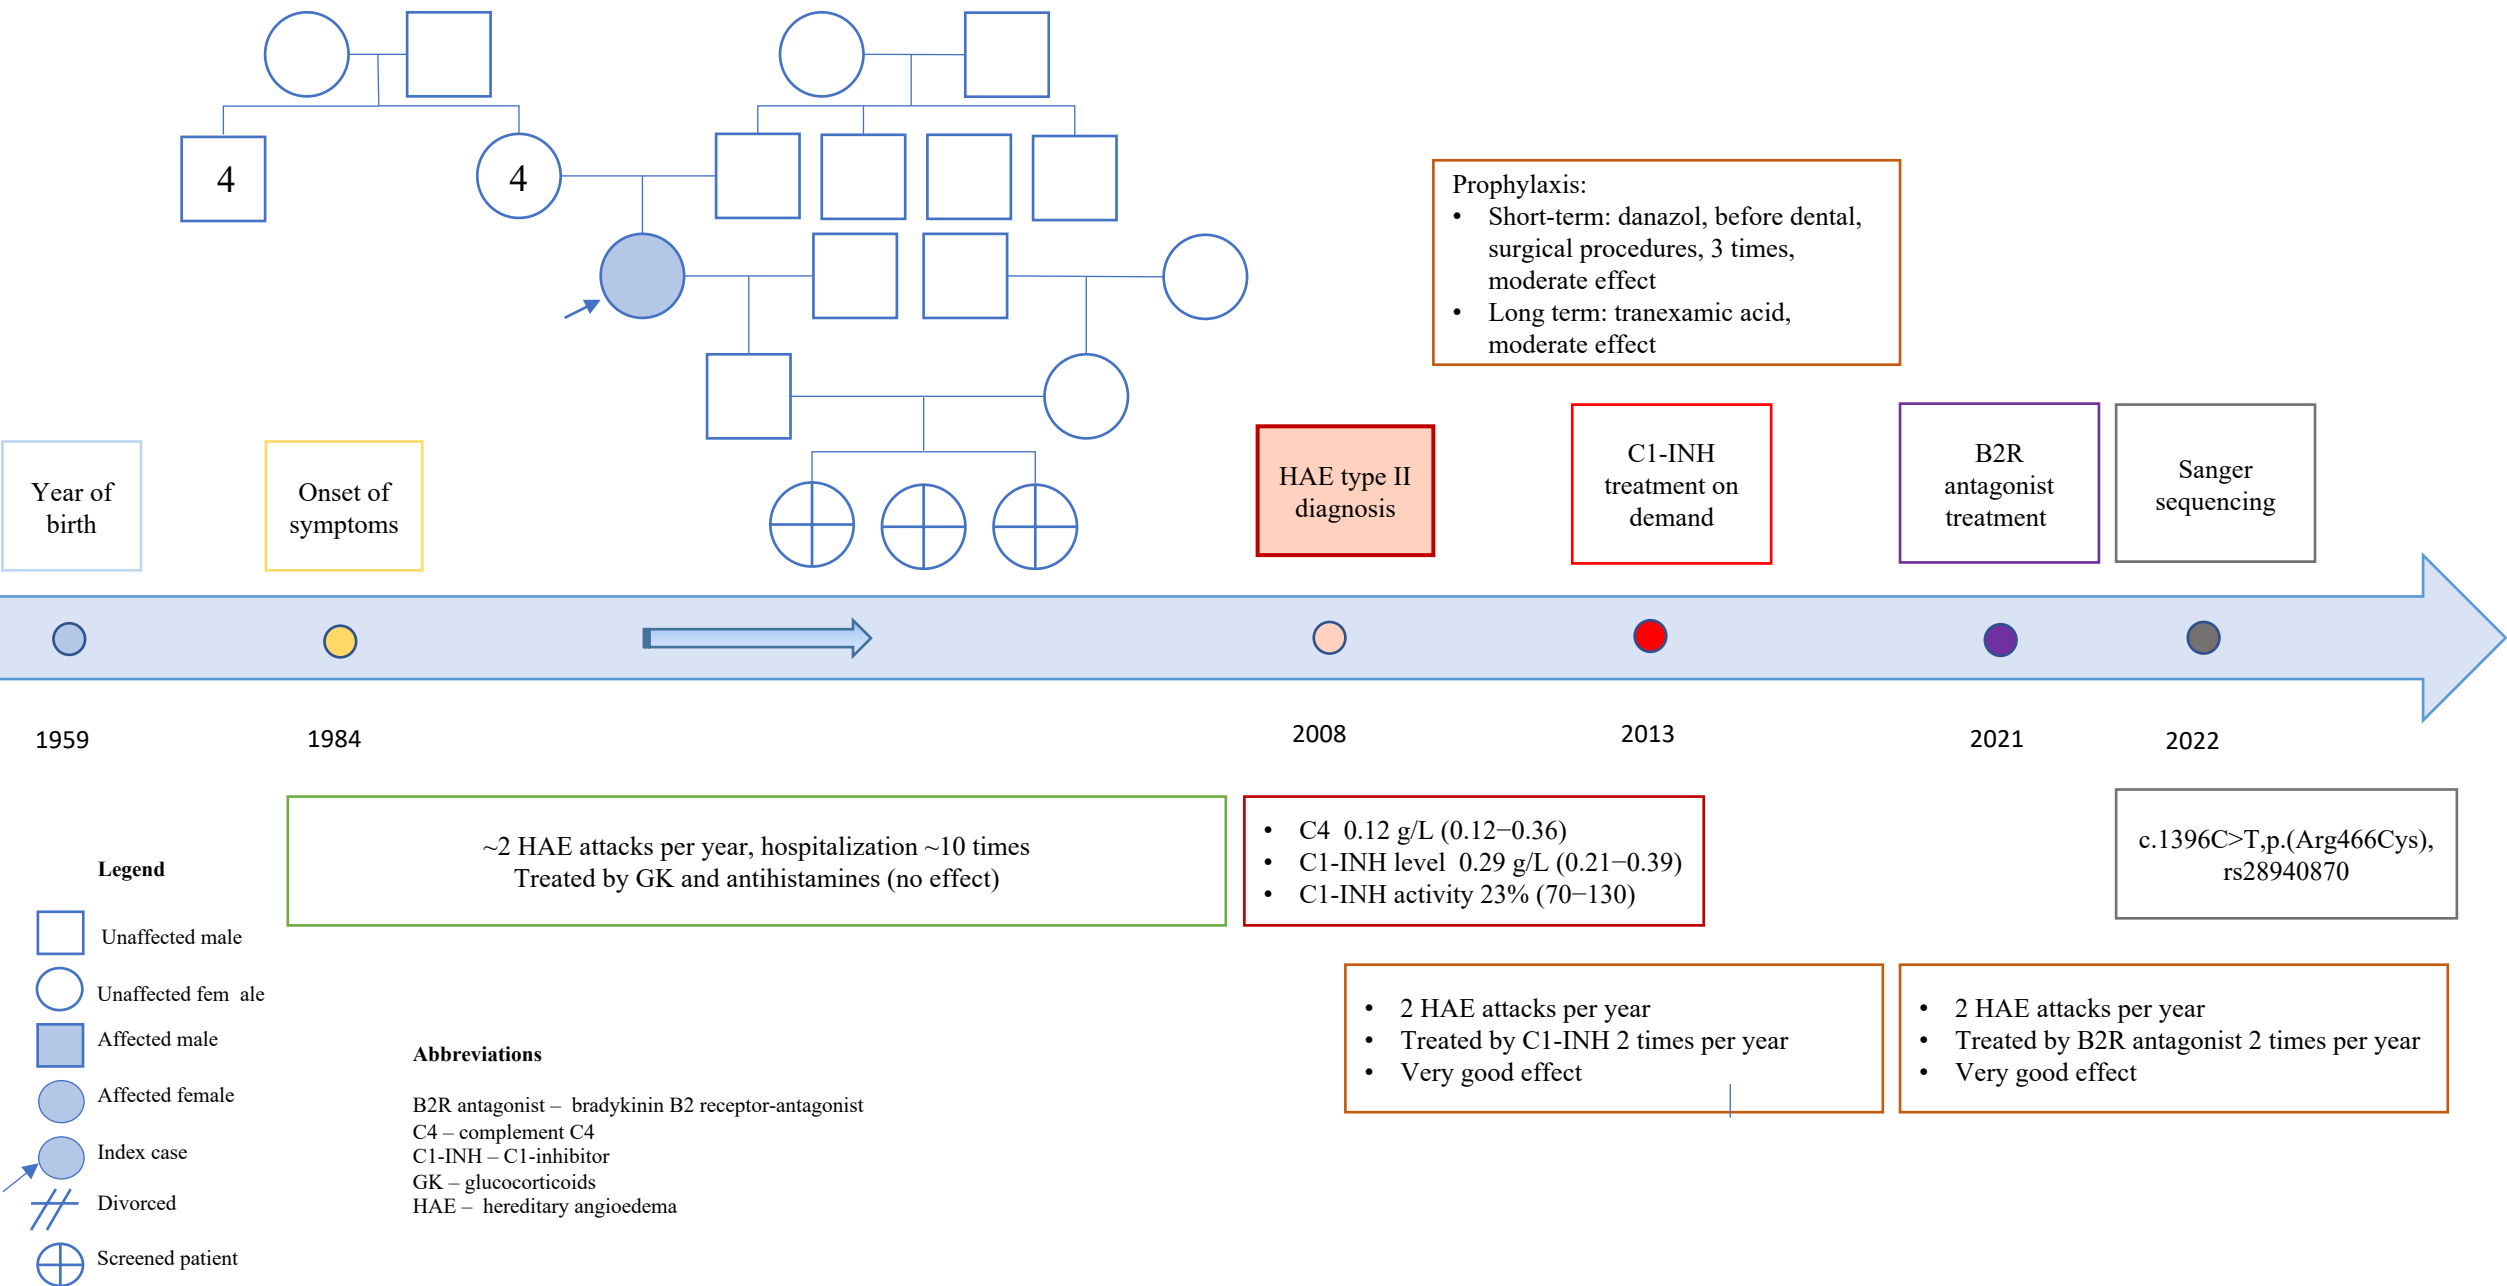

**Additional file 1: figure S2.** Family tree and timeline presentation of clinical characteristics therapy laboratory and genetic test results in a patient with hereditary angioedema **Patient 2**

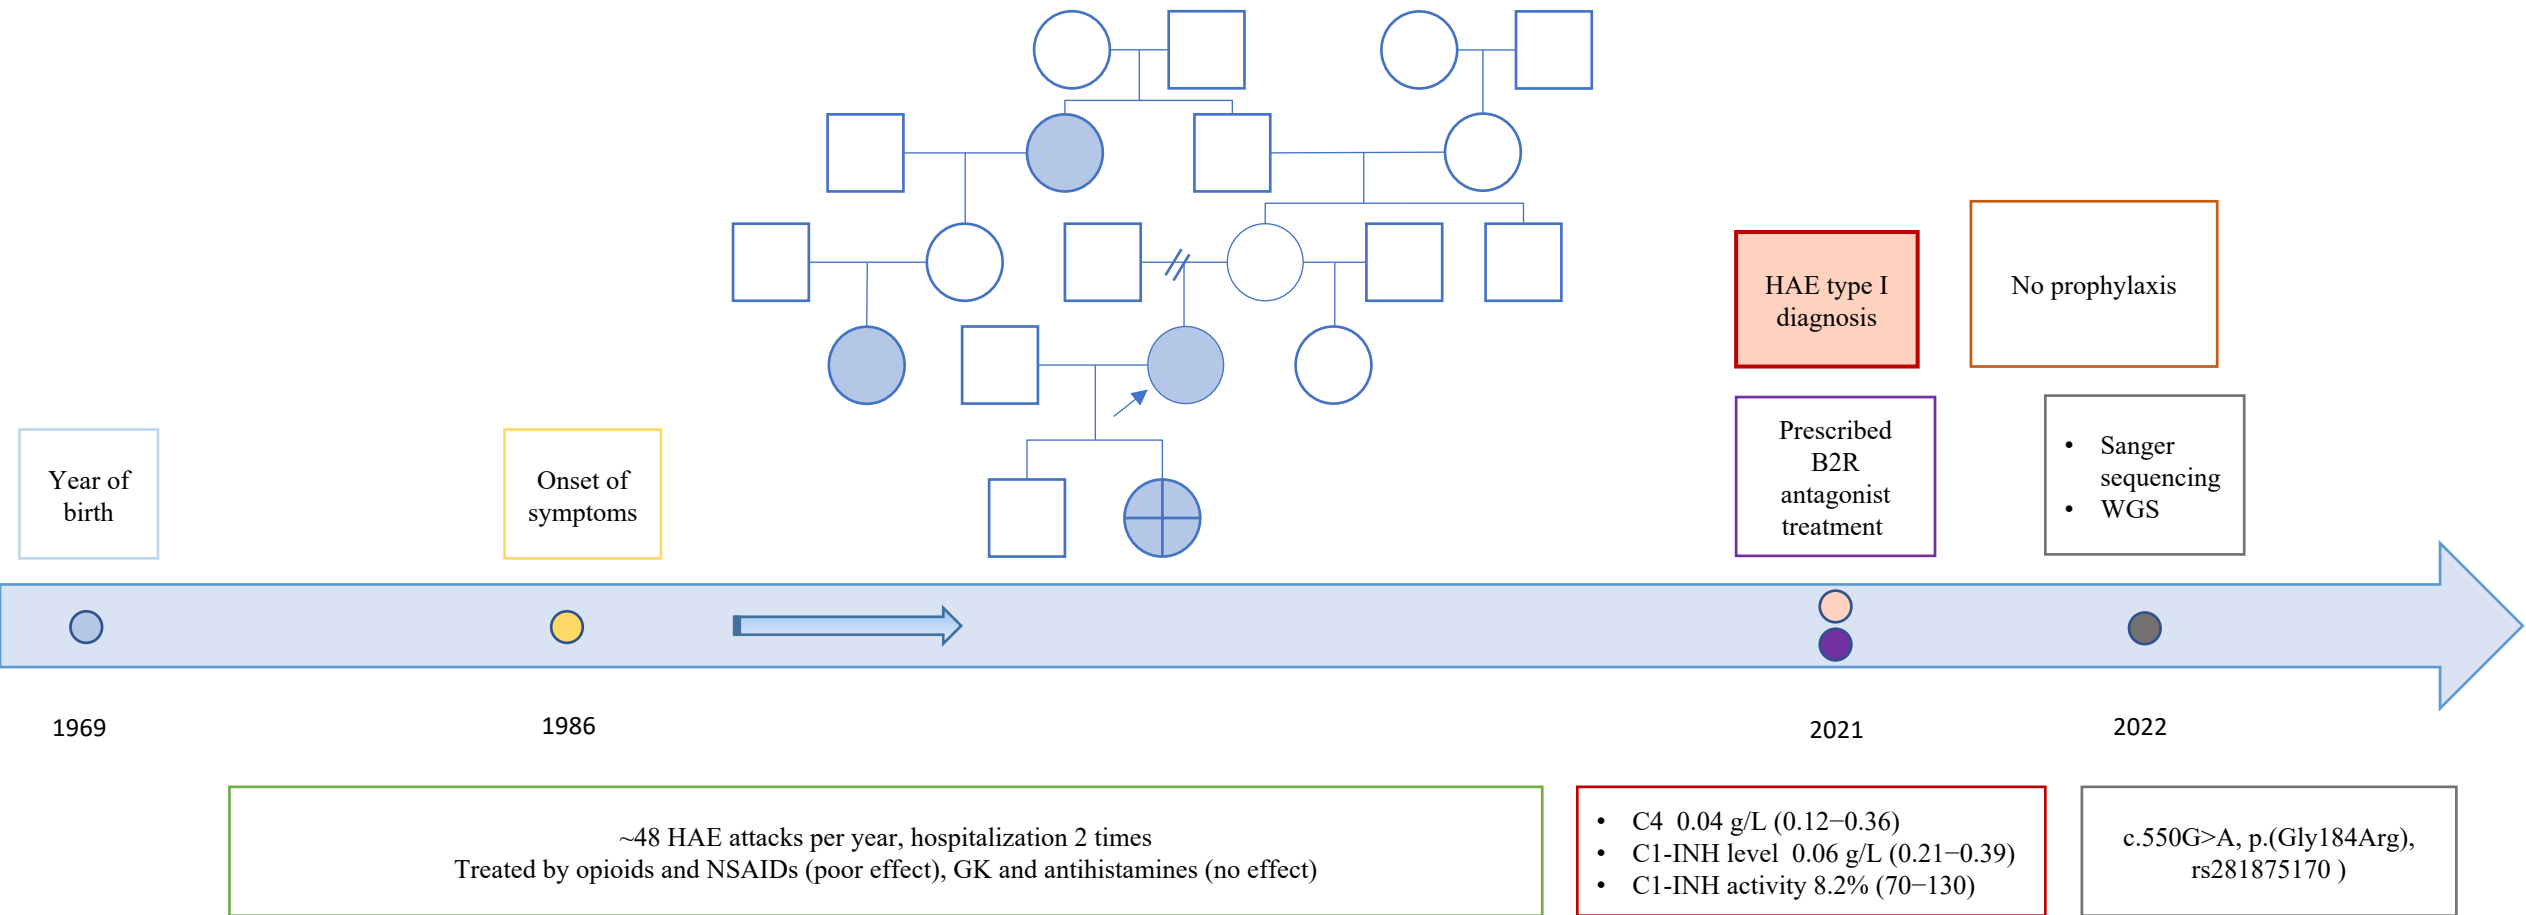

**Abbreviations**

B2R antagonist – bradykinin B2 receptor-antagonist  
 C1-INH – C1-inhibitor  
 C4 – complement C4  
 GK – glucocorticoids  
 HAE – hereditary angioedema  
 NSAIDs – non-steroidal anti-inflammatory drugs  
 WGS – whole genome sequencing

**Additional file: figure S3.** Family tree and timeline presentation of clinical characteristics, therapy, laboratory and genetic test results in a patient with hereditary angioedema. **Patient 3**

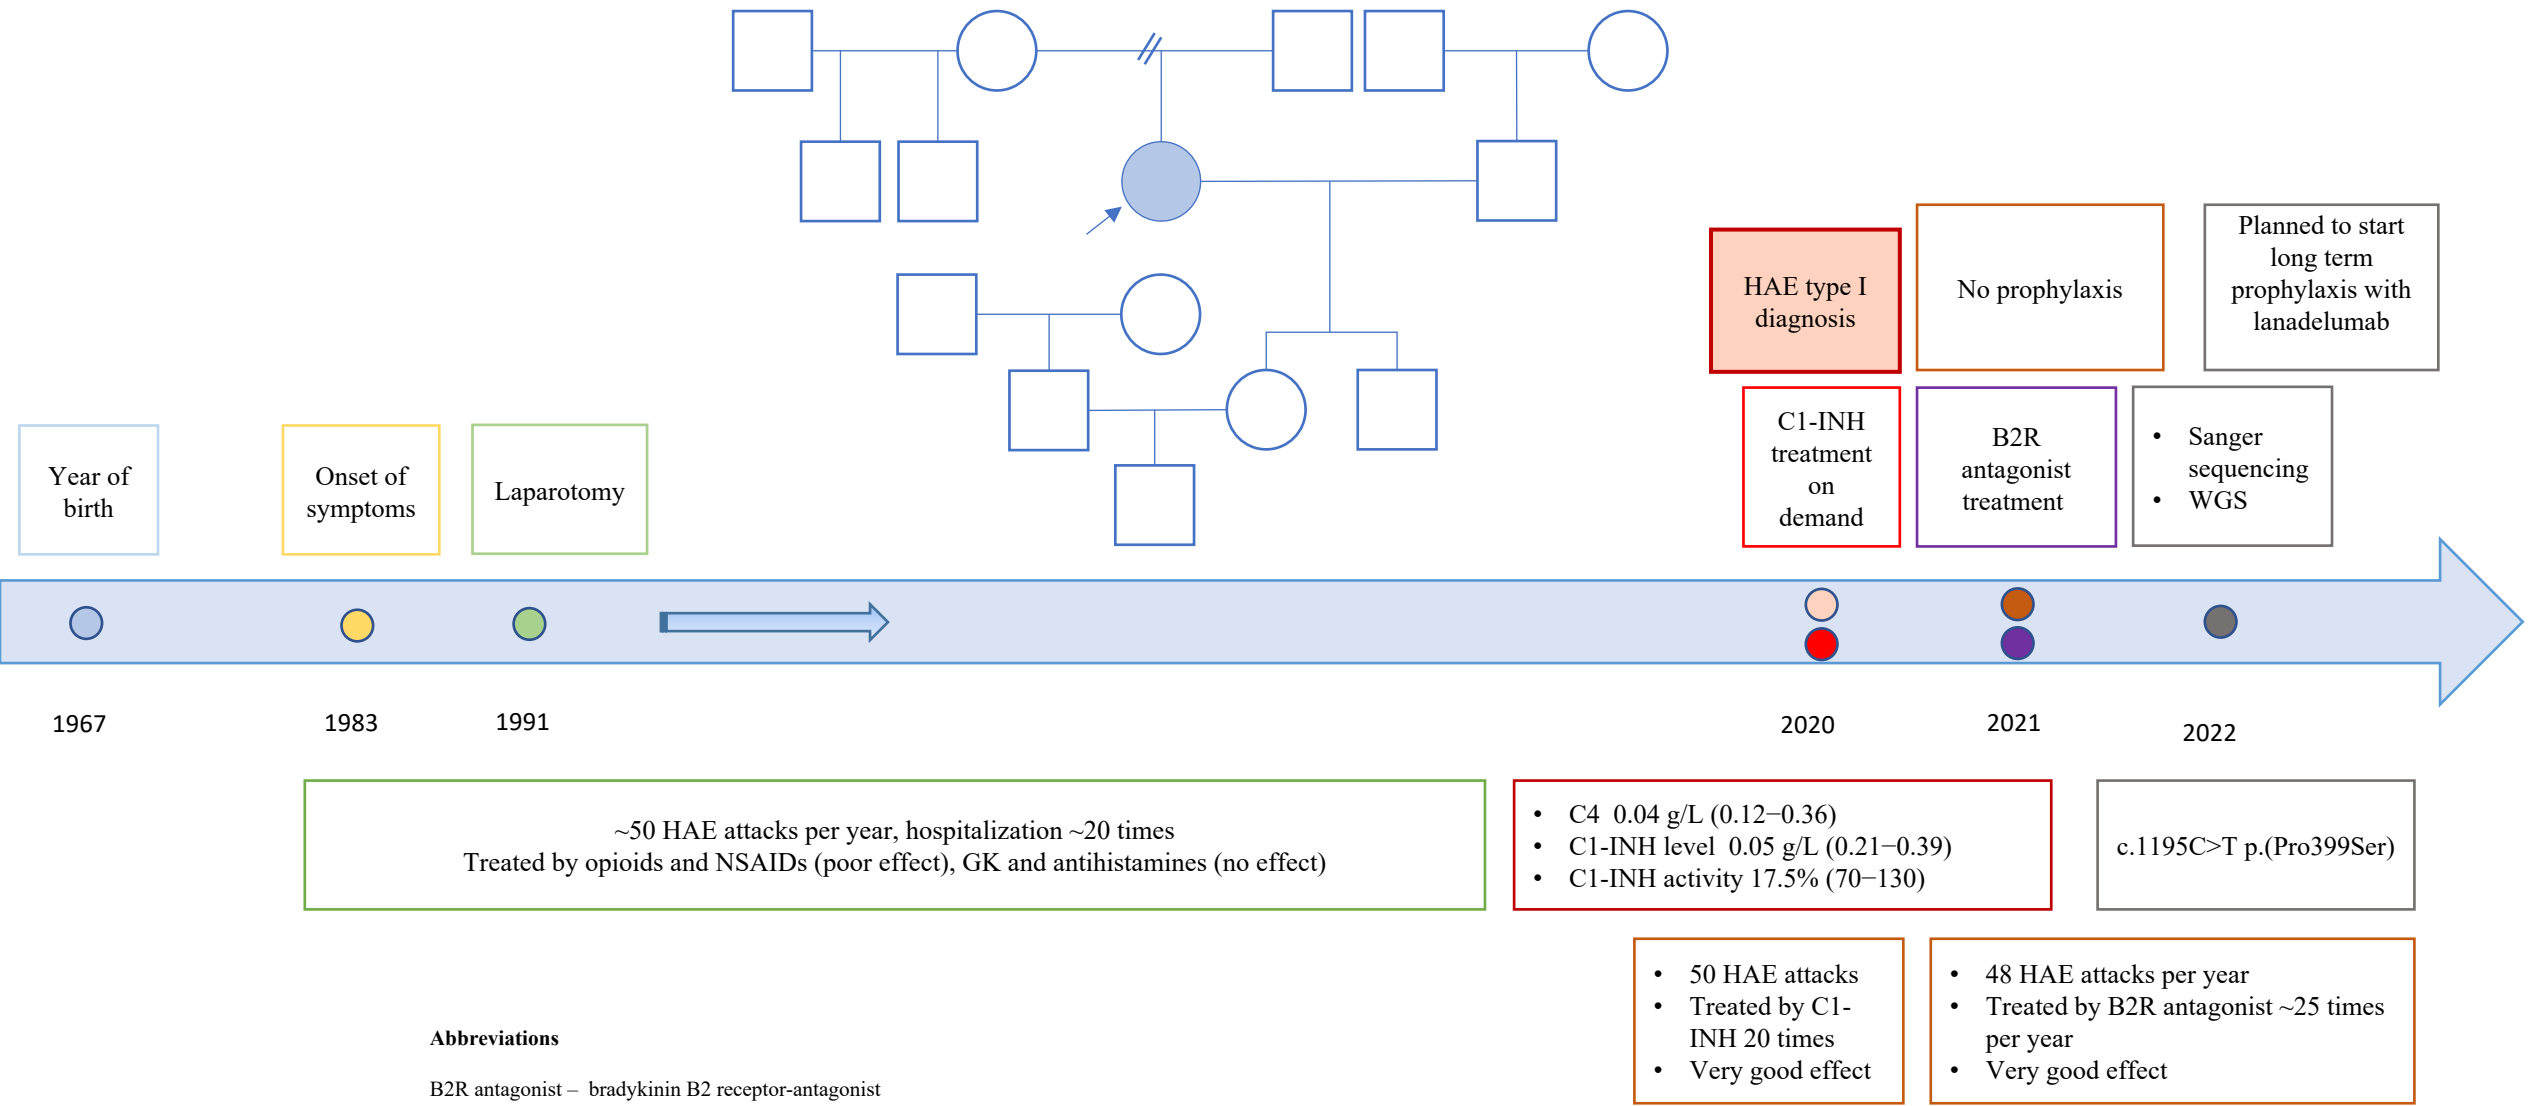

**Abbreviations**

- B2R antagonist – bradykinin B2 receptor-antagonist
- C1-INH – C1-inhibitor
- C4 – complement C4
- GK – glucocorticoids
- HAE – hereditary angioedema
- NSAIDs – non-steroidal anti-inflammatory drugs
- WGS – whole genome sequencing

**Additional file: figure S4.** Family tree and timeline presentation of clinical characteristics, therapy, laboratory and genetic test results in a patient with hereditary angioedema. **Patient 4**

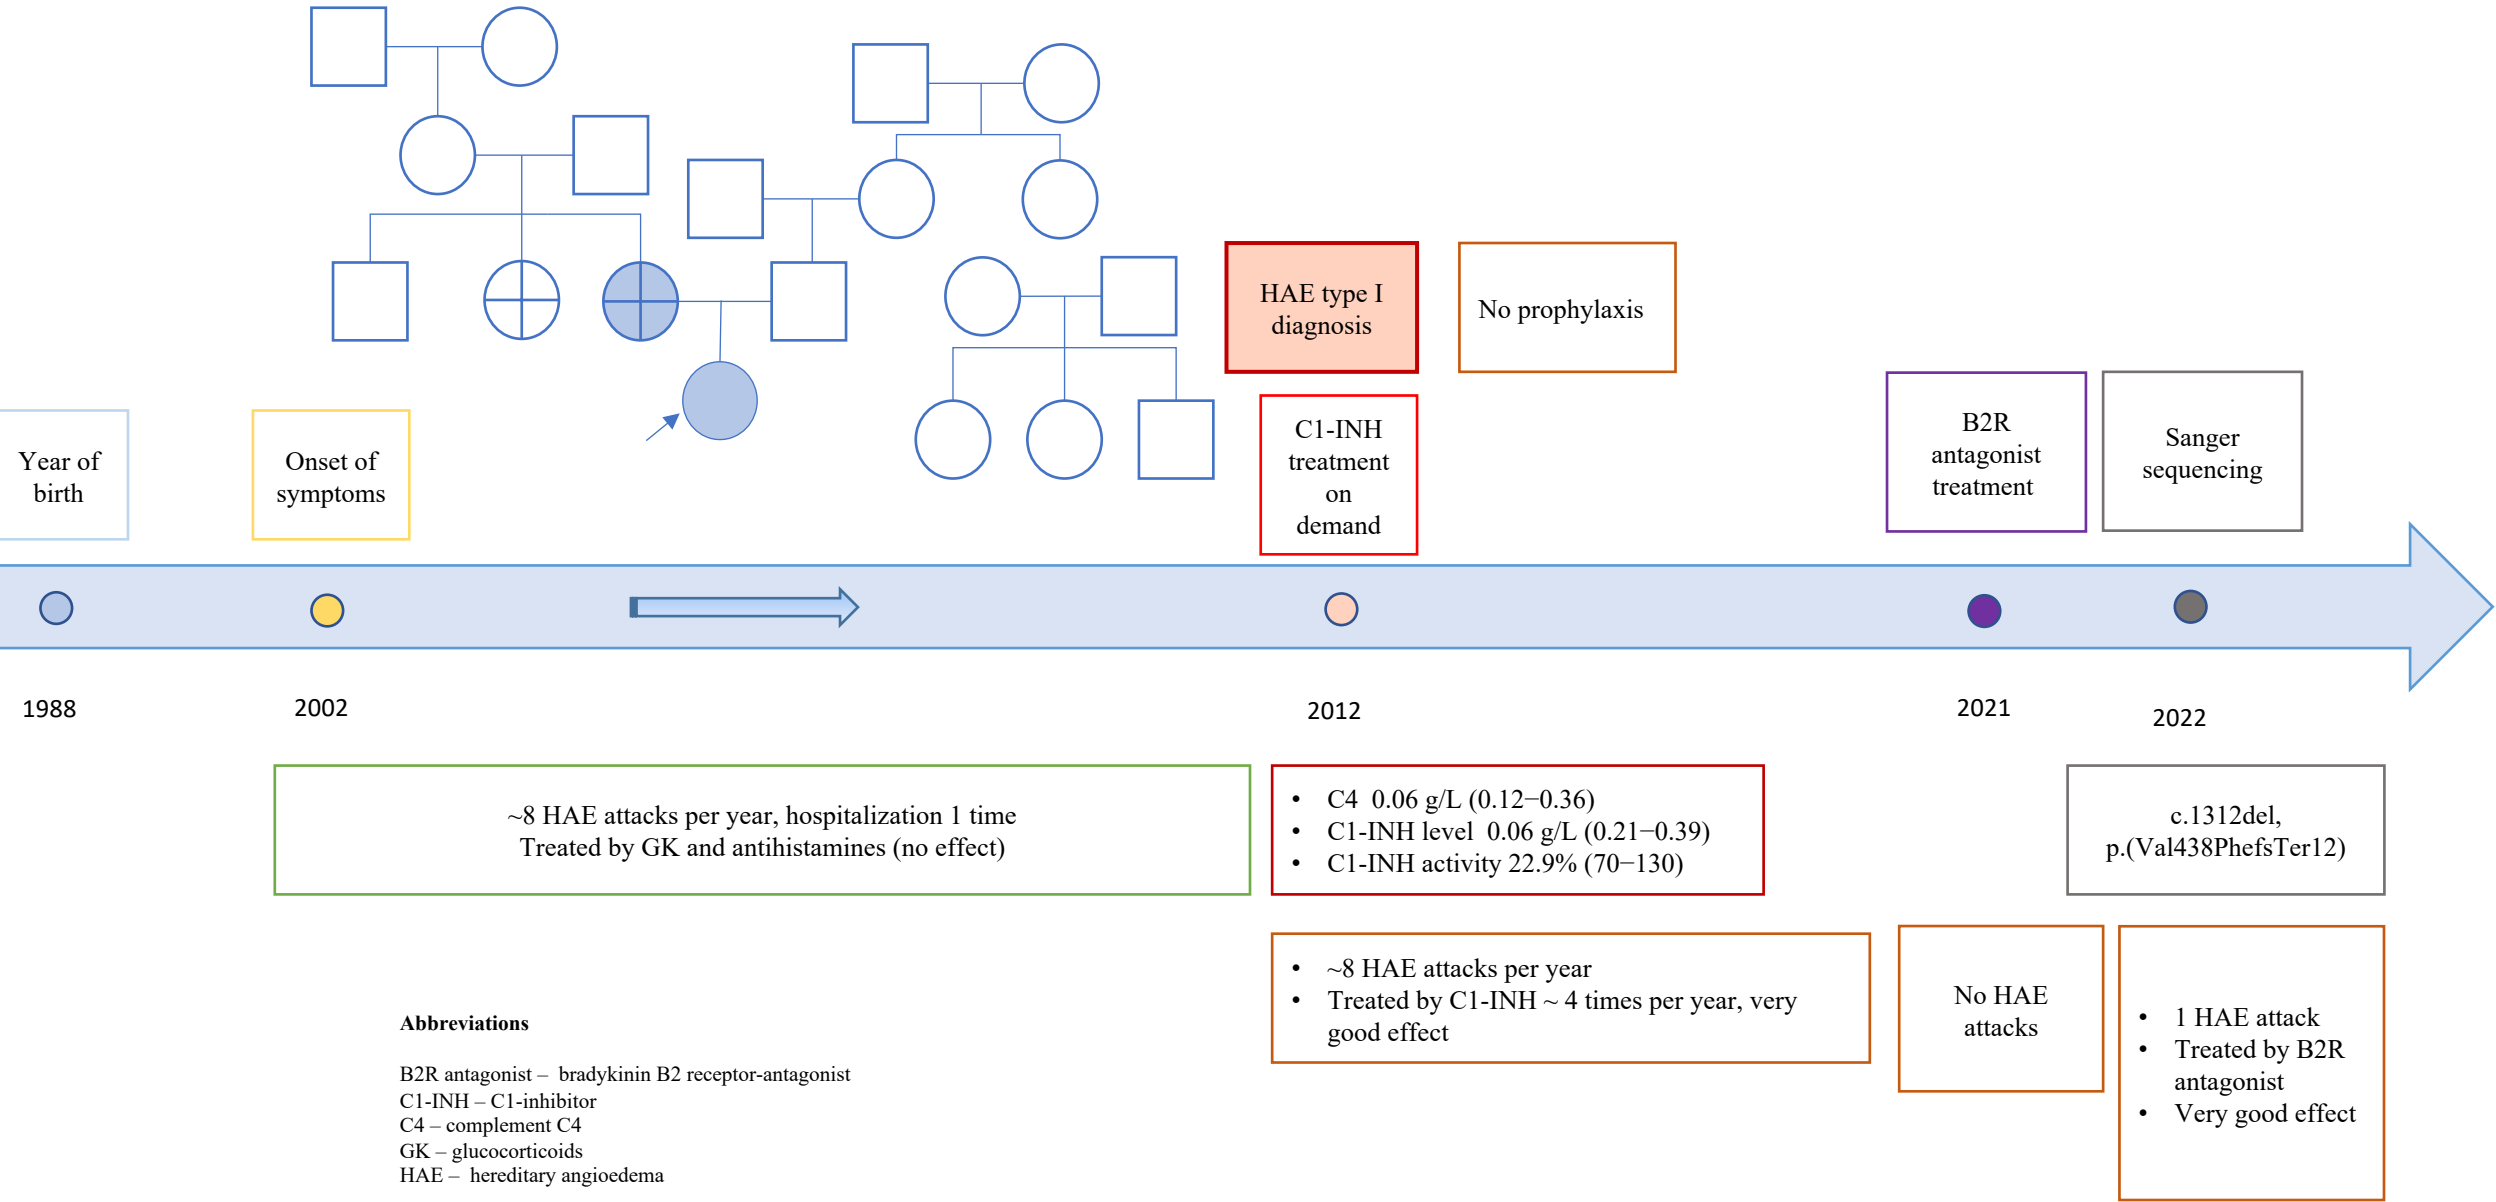

**Additional file 1: figure S5.** Family tree and timeline presentation of clinical characteristics, therapy, laboratory and genetic test results in a patient with hereditary angioedema. **Patient 5**

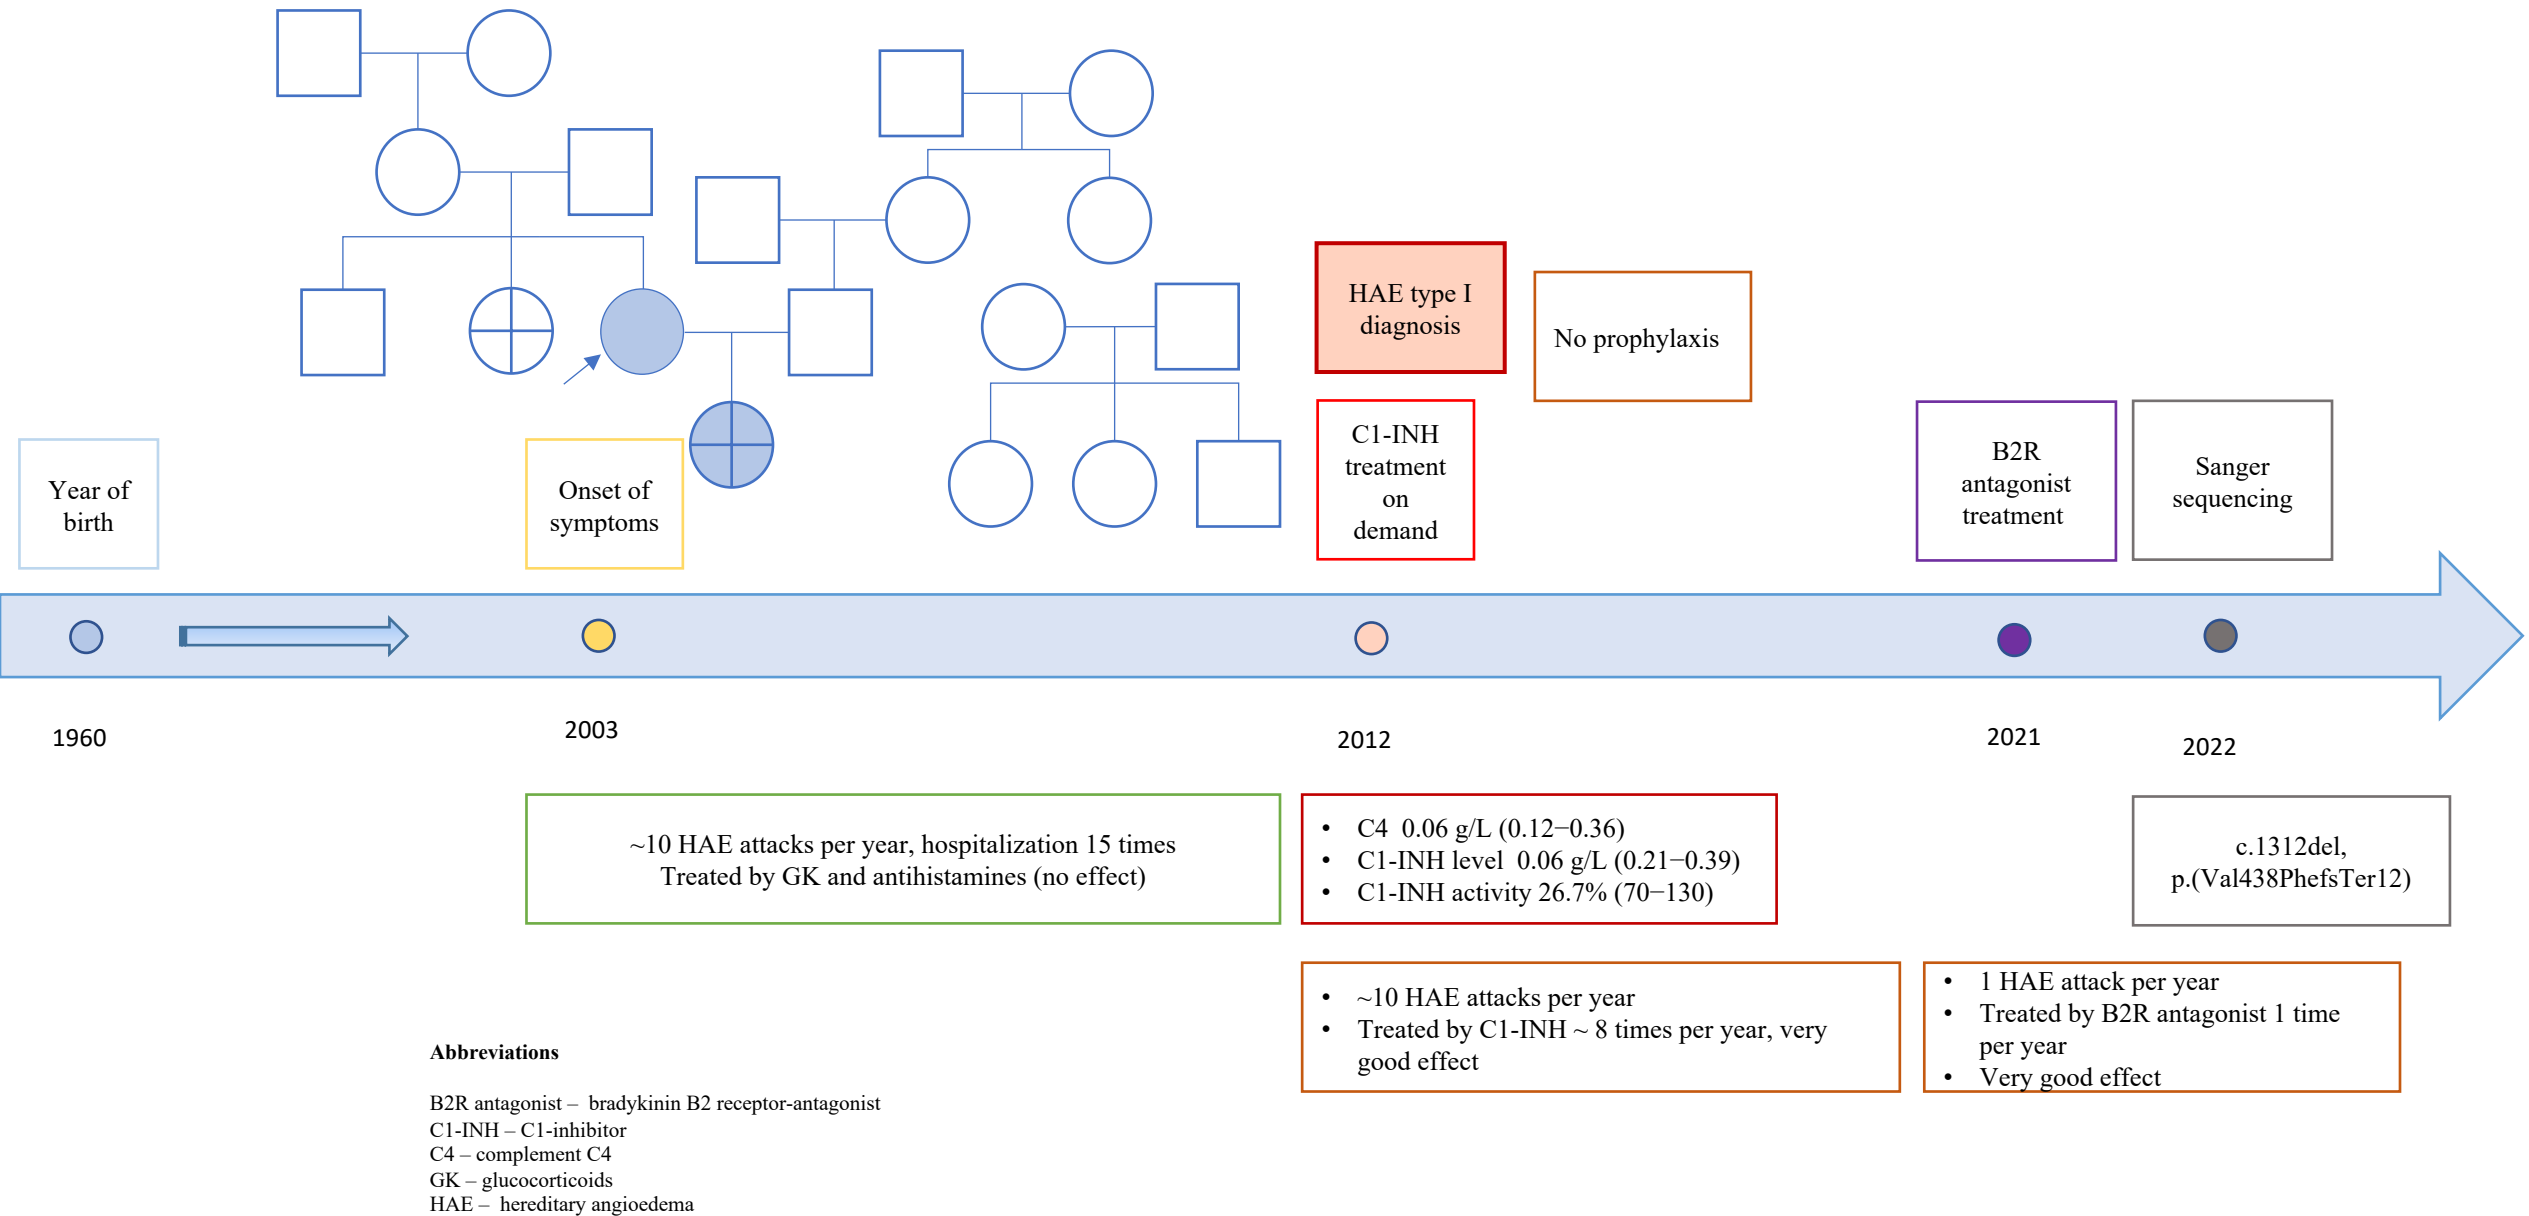

**Additional file 1: figure S6.** Family tree and timeline presentation of clinical characteristics, therapy, laboratory and genetic test results in a patient with hereditary angioedema. **Patient 6**

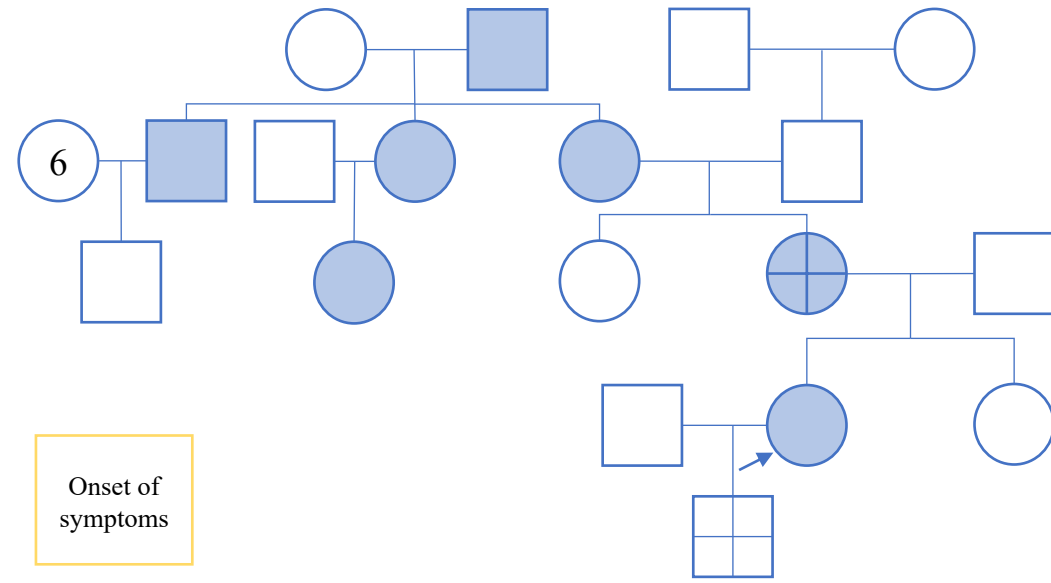

**Prophylaxis:**

- Short-term: FFP, before dental, surgical procedures, 2 times, poor effect; danazol 3 times, moderate effect
- Long term: danazol, tranexamic acid, moderate effect

Planned to start long term prophylaxis with lanadelumab

Year of birth

Onset of symptoms

HAE type I diagnosis

C1-INH treatment on demand

B2R antagonist treatment

- Sanger sequencing
- WGS

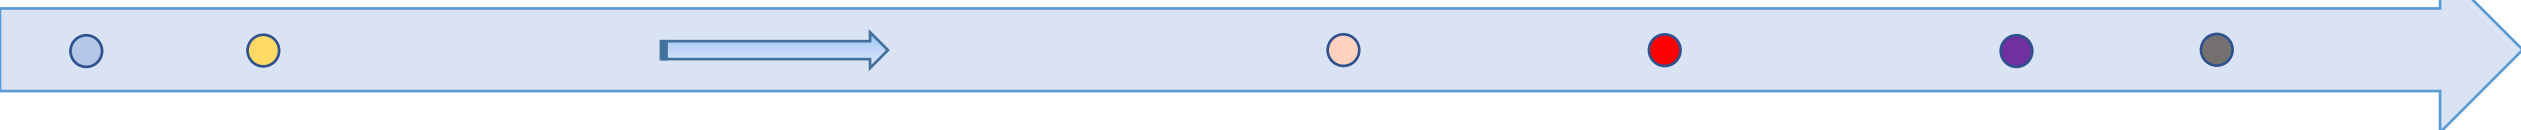

1987      1994      2006      2013      2021      2022

~60 HAE attacks per year, hospitalization 3 times  
Treated by GK and antihistamines (no effect)

- C4 0.05 g/L (0.12–0.36)
- C1-INH level 0.07 g/L (0.21–0.39)
- C1-INH activity 22.9% (70–130)

c.1249+4A>G, p.?

- ~60 HAE attacks per year
- Treated by C1-INH ~10 times per year, very good effect
- Treated by FFP 3 times, poor effect

- ~60 HAE attacks per year
- Treated by B2R antagonist ~30 times per year
- Very good effect

**Abbreviations**

- B2R antagonist – bradykinin B2 receptor-antagonist
- C1-INH – C1-inhibitor
- C4 – complement C4
- FFP – fresh frozen plasma
- GK – glucocorticoids
- HAE – hereditary angioedema
- WGS – whole genome sequencing

**Additional file 1: figure S7.** Family tree and timeline presentation of clinical characteristics, therapy, laboratory and genetic test results in a patient with hereditary angioedema. **Patient 7**

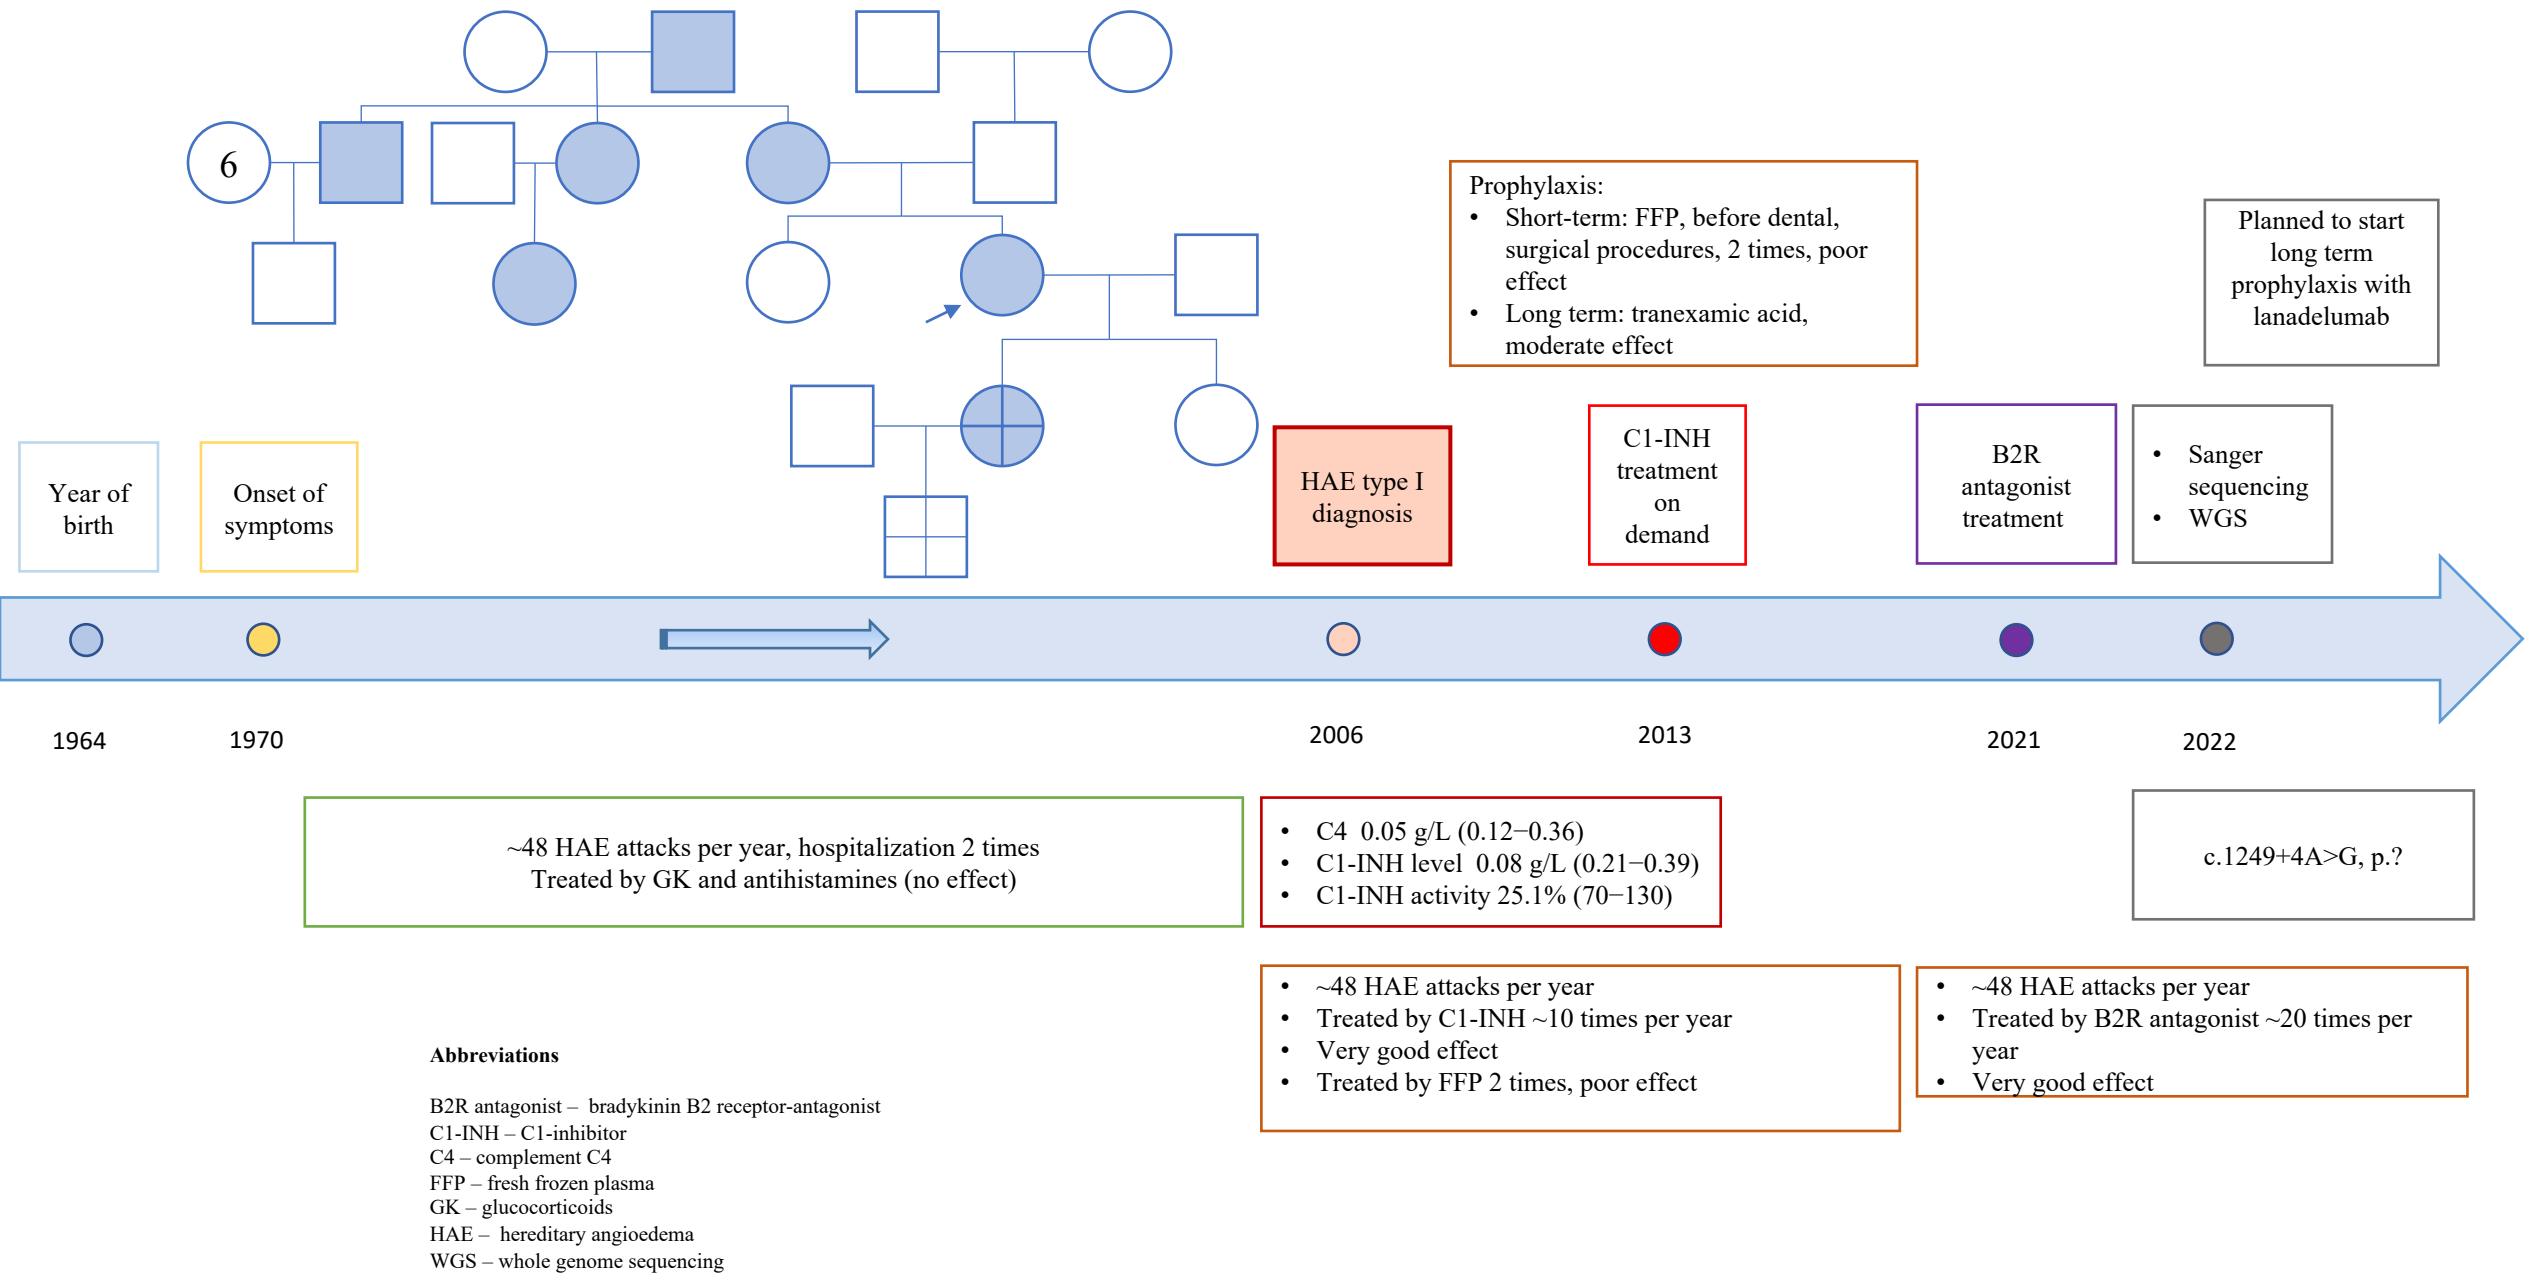

**Additional file 1: figure S8.** Family tree and timeline presentation of clinical characteristics, therapy, laboratory and genetic test results in a patient with hereditary angioedema. **Patient 8**

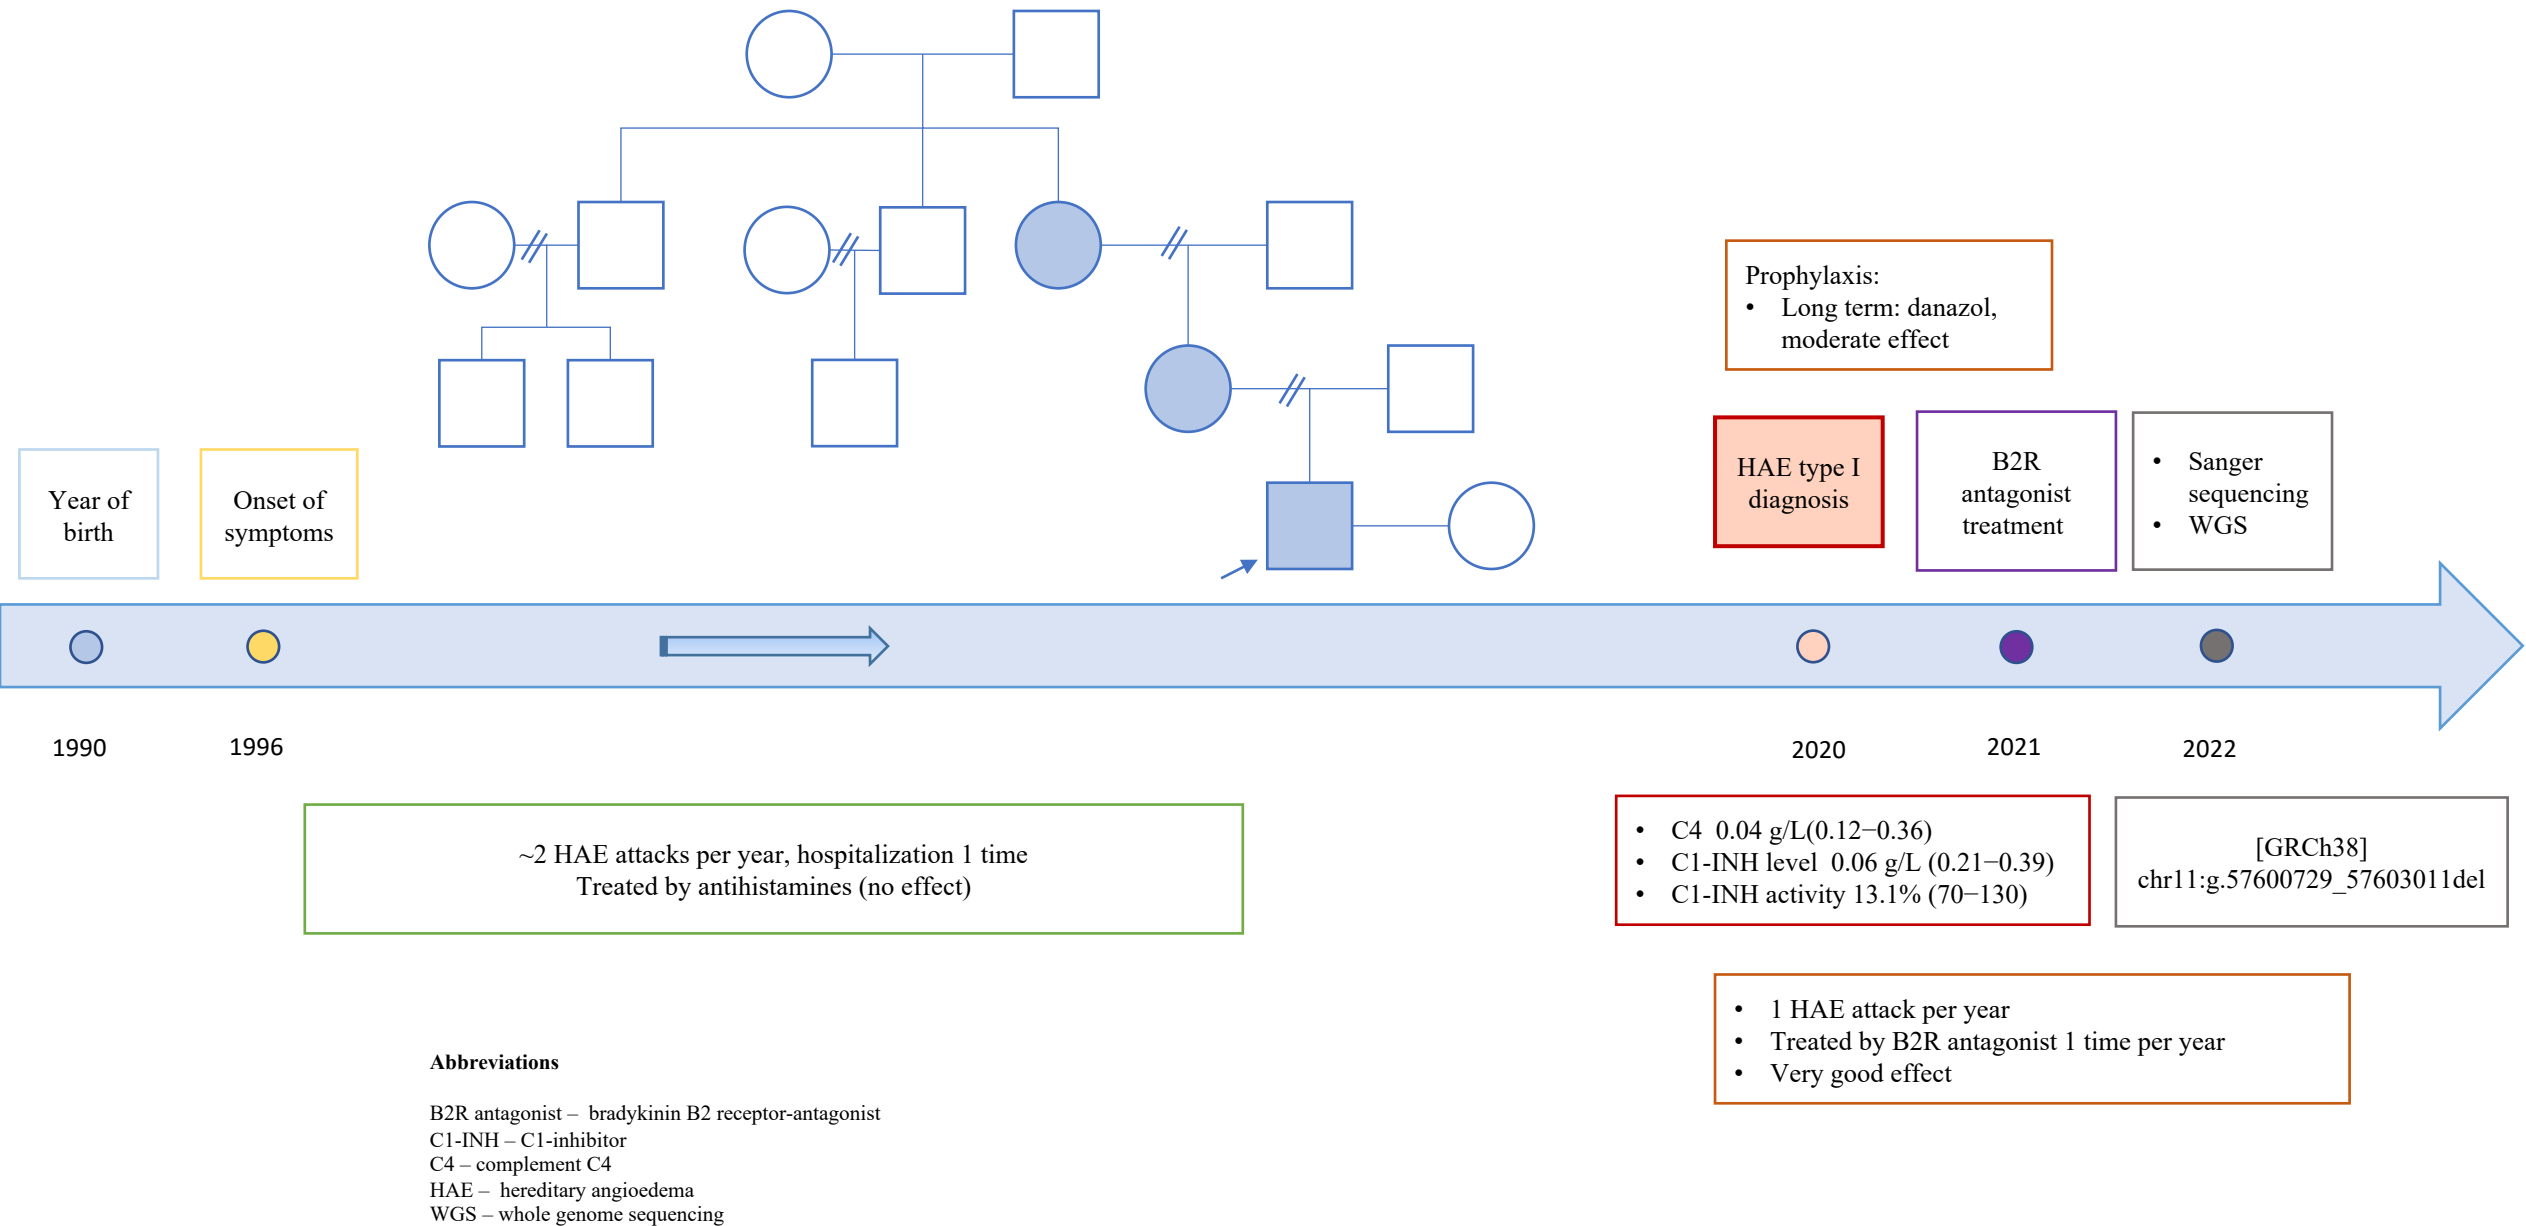



**Additional file 1: figure S9.** Family tree and timeline presentation of clinical characteristics, therapy, laboratory and genetic test results in a patient with hereditary angioedema. **Patient 9**

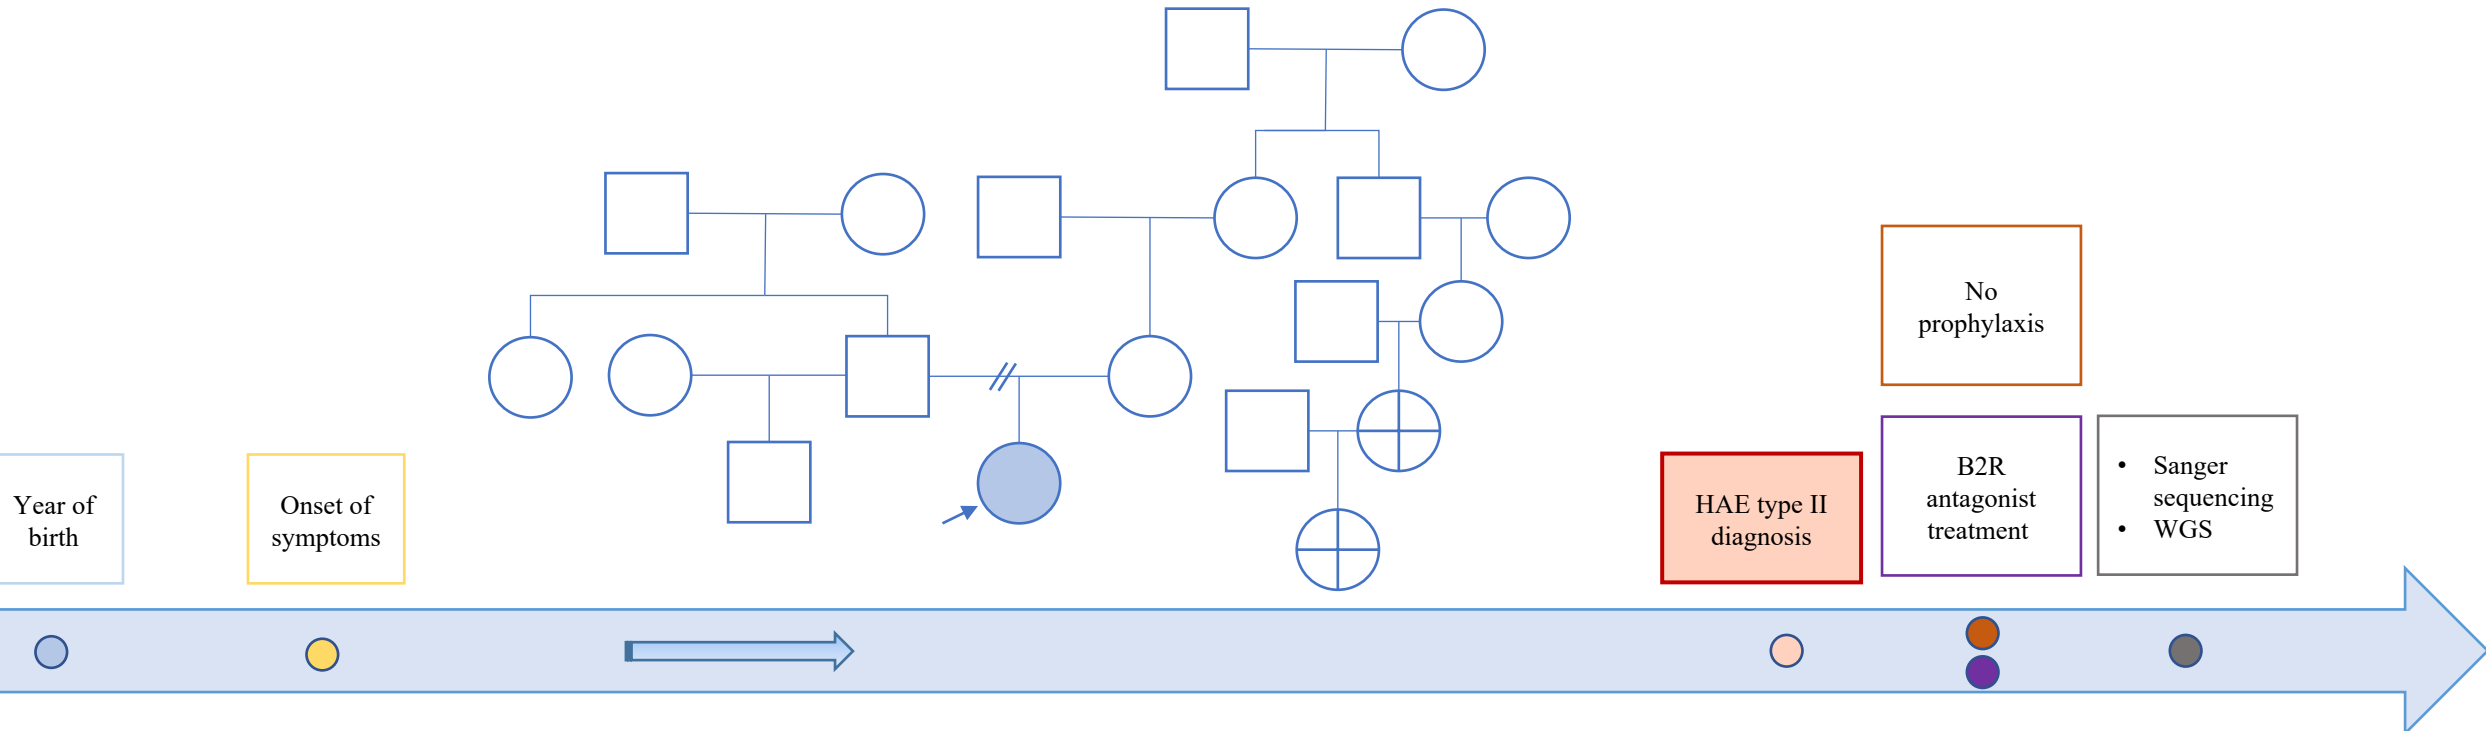

1-2 HAE attacks per year, hospitalization 2 times  
Treated by NSAIDs (poor effect), GK and antihistamines (no effect)

- C4 0.11 g/L(0.12–0.36)
- C1-INH level 0.22 g/L (0.21–0.39)
- C1-INH activity 45% (70–130)

No pathogenic variations found

- 1 HAE attack per year
- Treated by B2R antagonist 1 time per year
- Very good effect

**Abbreviations**

- B2R antagonist – bradykinin B2 receptor-antagonist
- C1-INH – C1-inhibitor
- C4 – complement C4
- GK – glucocorticoids
- HAE – hereditary angioedema
- NSAIDs – non-steroidal anti-inflammatory drugs
- WGS – whole genome sequencing

**Additional file 1: figure S10.** Family tree and timeline presentation of clinical characteristics, therapy, laboratory and genetic test results in a patient with hereditary angioedema. **Patient 10**

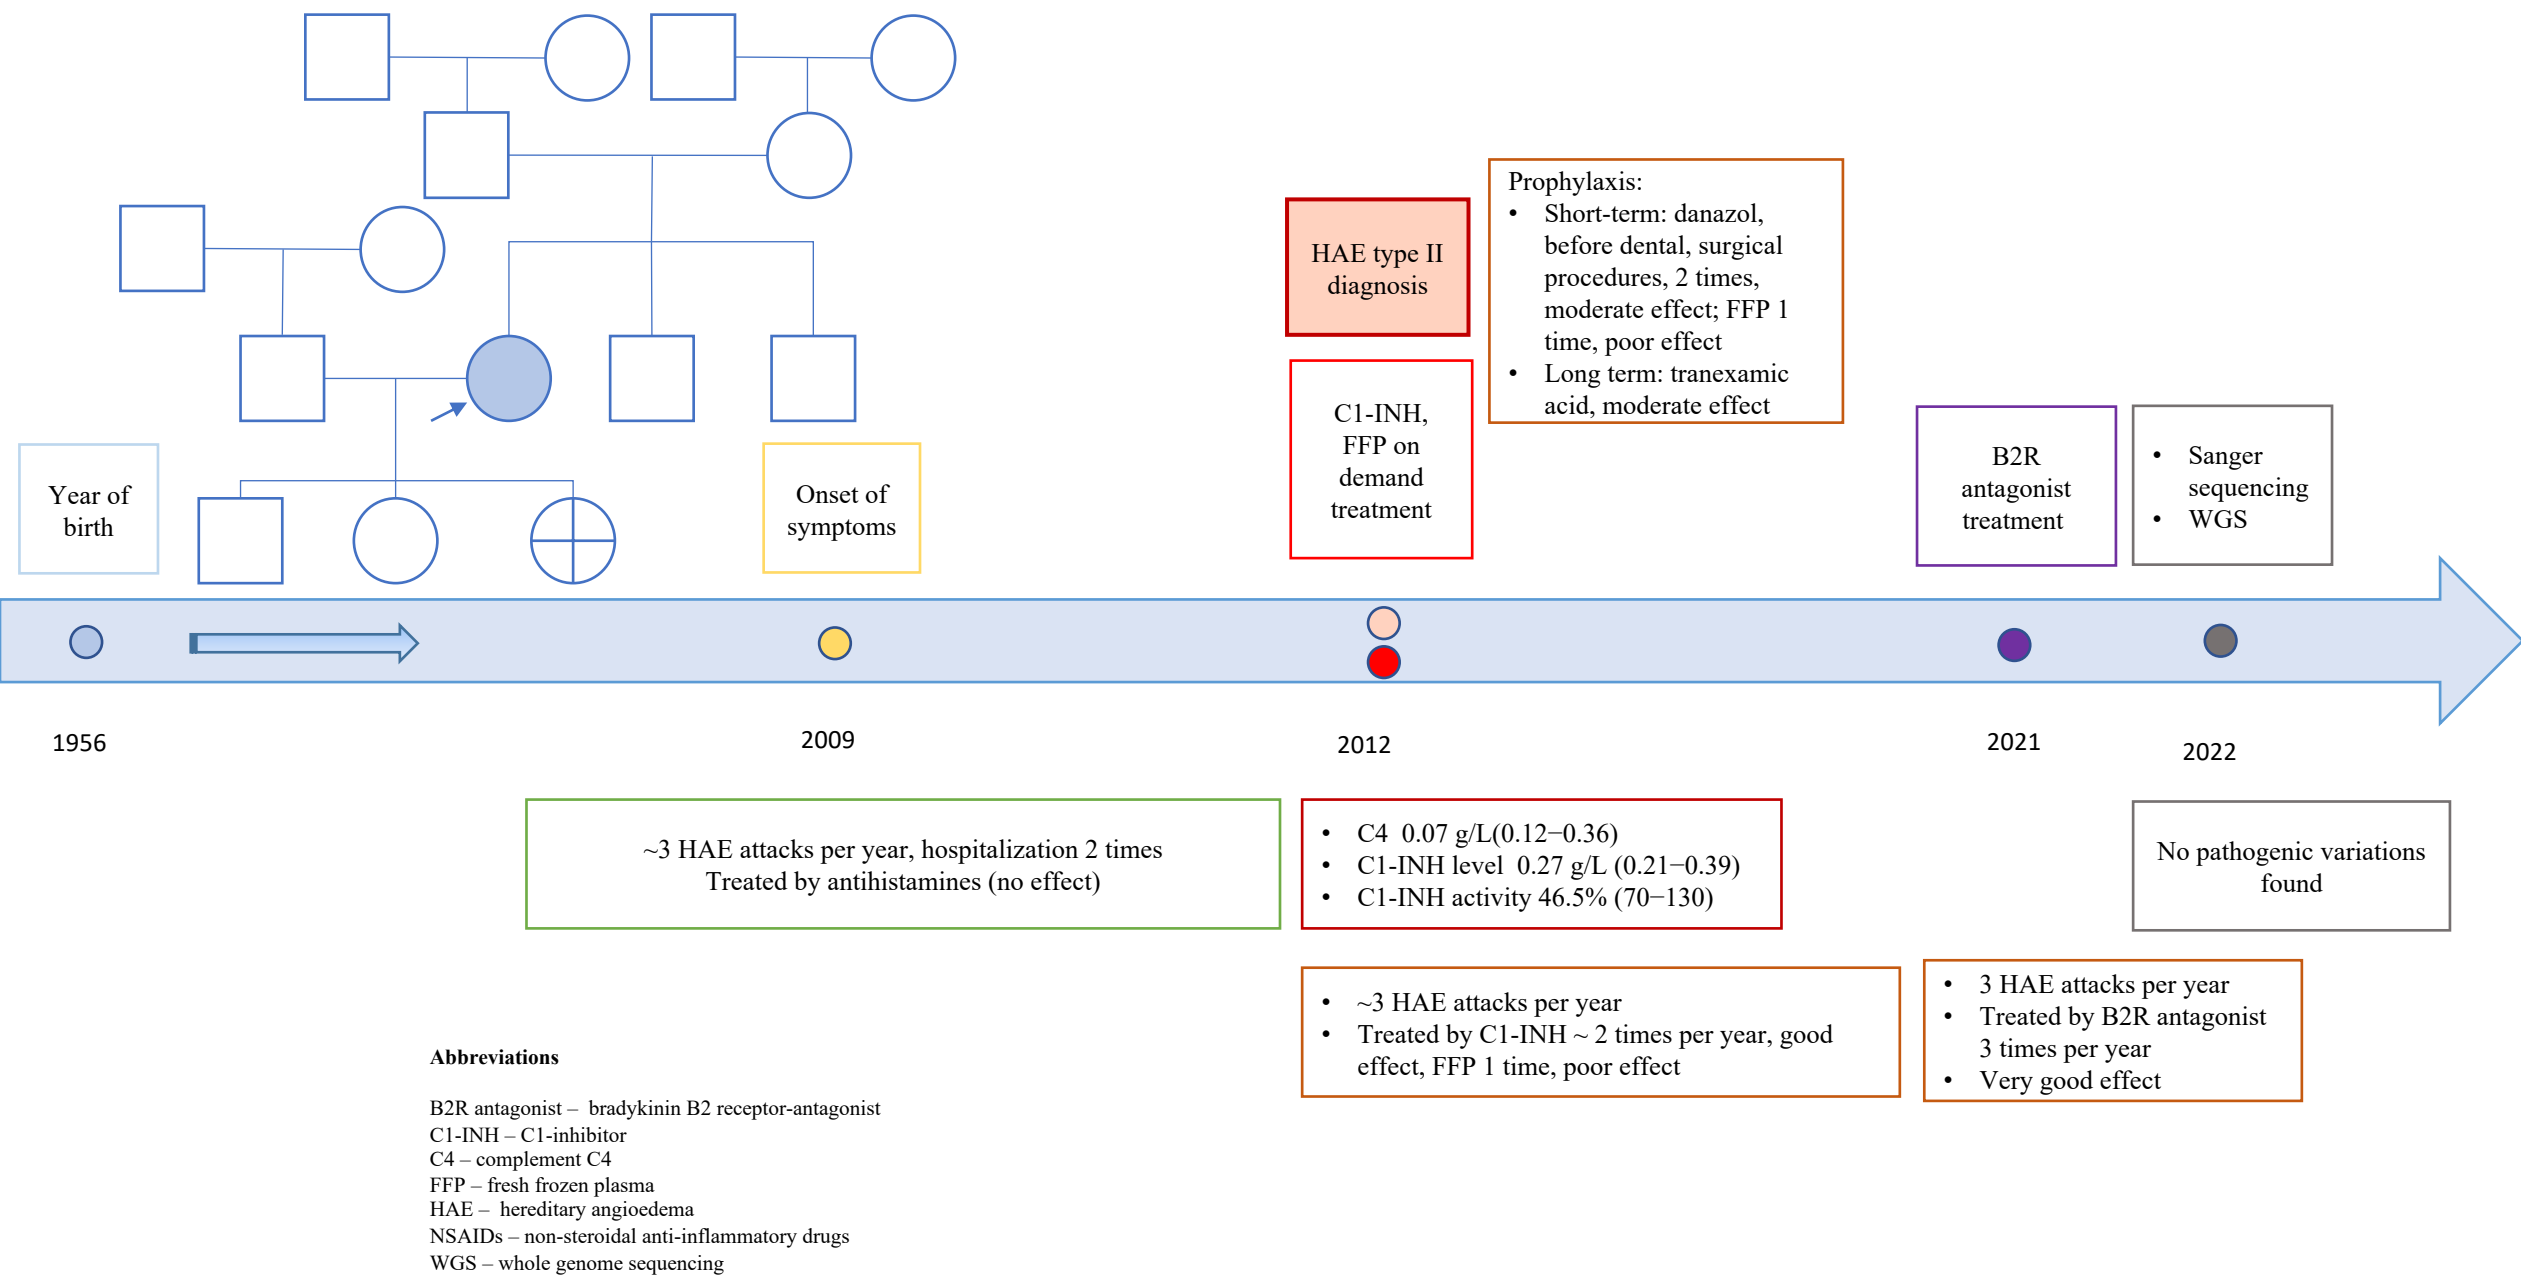

Supplement: 13223_2023_783_MOESM1_ESM.pdf [file 13223_2023_783_MOESM1_ESM.pdf]
